# Supplementary material for: Cubitanoids and Cembranoids from the Soft Coral Sinularia nanolobata
Source: MDPI journal article supplement (doi:10.3390/md14080150), 2016-08-09
Supplement: s1 [file s1]

## Supplementary Materials: Cubitanoids and Cembranoids from the Soft Coral *Sinularia nanolobata*

Chih-Hua Chao, Chia-Yun Wu, Chiung-Yao Huang, Hui-Chun Wang, Chang-Feng Dai, Yang-Chang Wu and Jyh-Horng Sheu

List of Supplementary material:

| No                | Content                                                                   | page |
|-------------------|---------------------------------------------------------------------------|------|
| <b>Figure S1</b>  | HRESIMS spectrum of <b>1</b> .                                            | S2   |
| <b>Figure S2</b>  | <sup>1</sup> H NMR spectrum of <b>1</b> in CDCl <sub>3</sub> at 400 MHz.  | S3   |
| <b>Figure S3</b>  | <sup>13</sup> C NMR spectrum of <b>1</b> in CDCl <sub>3</sub> at 100 MHz. | S4   |
| <b>Figure S4</b>  | HRESIMS spectrum of <b>2</b> .                                            | S5   |
| <b>Figure S5</b>  | <sup>1</sup> H NMR spectrum of <b>2</b> in CDCl <sub>3</sub> at 400 MHz.  | S6   |
| <b>Figure S6</b>  | <sup>13</sup> C NMR spectrum of <b>2</b> in CDCl <sub>3</sub> at 100 MHz. | S7   |
| <b>Figure S7</b>  | HRESIMS spectrum of <b>3</b> .                                            | S8   |
| <b>Figure S8</b>  | <sup>1</sup> H NMR spectrum of <b>3</b> in CDCl <sub>3</sub> at 400 MHz.  | S9   |
| <b>Figure S9</b>  | <sup>13</sup> C NMR spectrum of <b>3</b> in CDCl <sub>3</sub> at 100 MHz. | S10  |
| <b>Figure S10</b> | HRESIMS spectrum of <b>4</b> .                                            | S11  |
| <b>Figure S11</b> | <sup>1</sup> H NMR spectrum of <b>4</b> in CDCl <sub>3</sub> at 400 MHz.  | S12  |
| <b>Figure S12</b> | <sup>13</sup> C NMR spectrum of <b>4</b> in CDCl <sub>3</sub> at 100 MHz. | S13  |
| <b>Figure S13</b> | HRESIMS spectrum of <b>5</b> .                                            | S14  |
| <b>Figure S14</b> | <sup>1</sup> H NMR spectrum of <b>5</b> in CDCl <sub>3</sub> at 500 MHz.  | S15  |
| <b>Figure S15</b> | <sup>13</sup> C NMR spectrum of <b>5</b> in CDCl <sub>3</sub> at 125 MHz. | S16  |

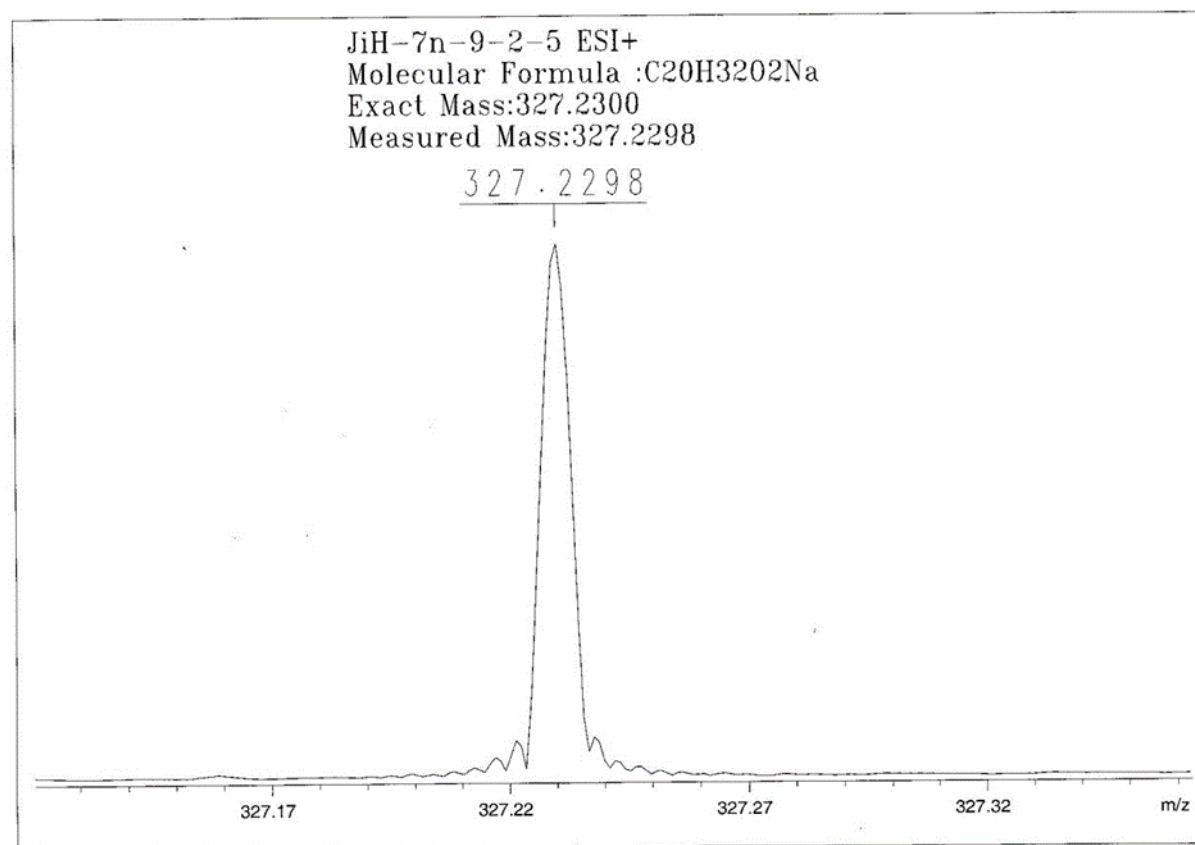

Figure S1. HRESIMS spectrum of 1.

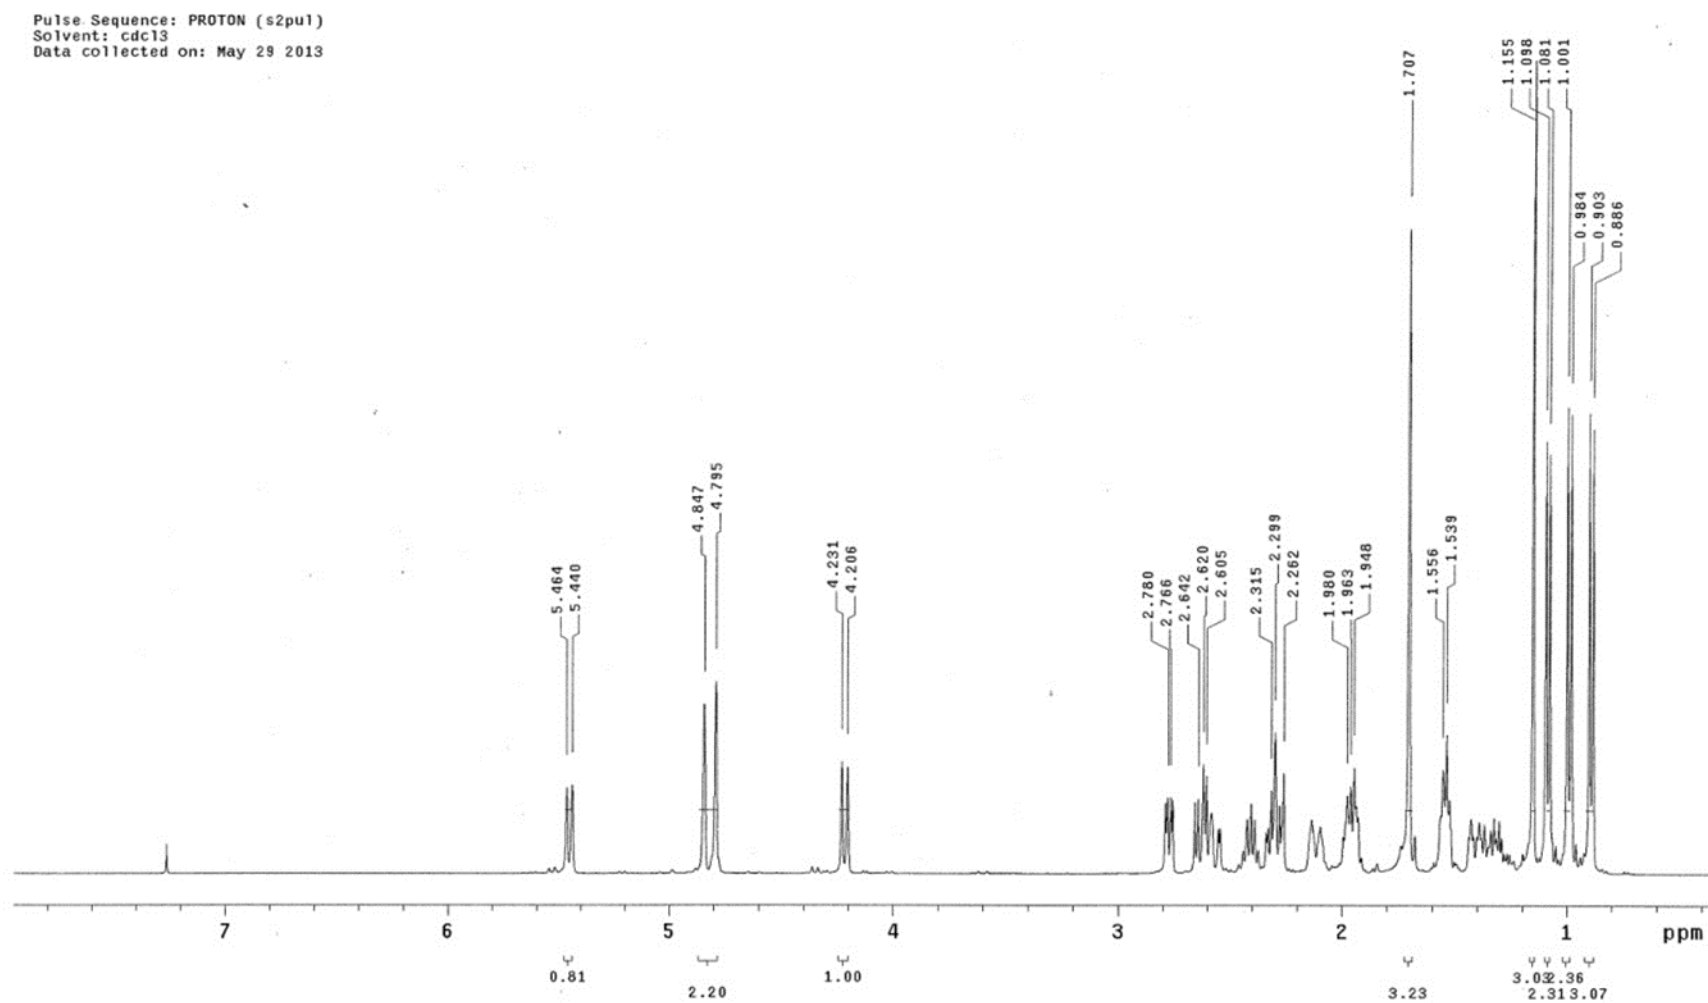

Figure S2.  $^1\text{H}$  NMR spectrum of **1** in  $\text{CDCl}_3$  at 400 MHz.

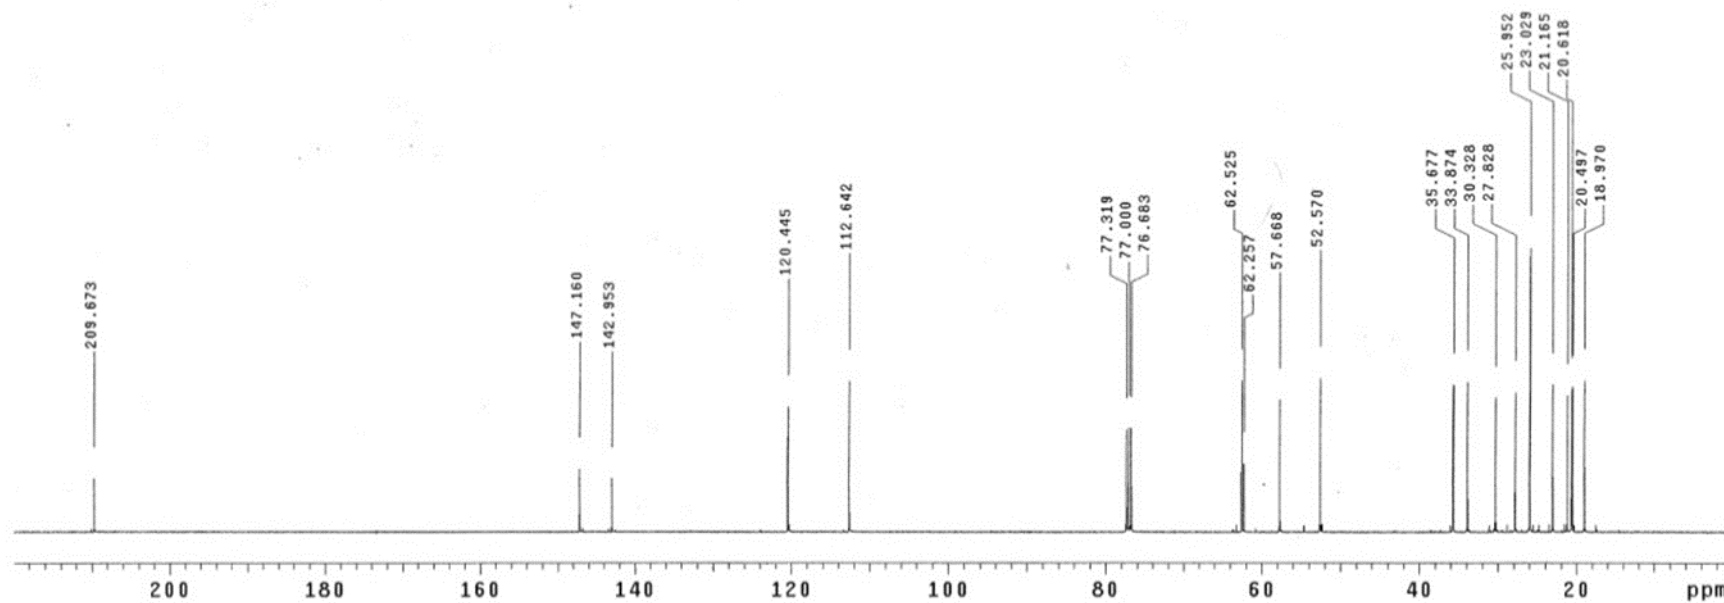

Figure S3.  $^{13}\text{C}$  NMR spectrum of 1 in  $\text{CDCl}_3$  at 100 MHz.

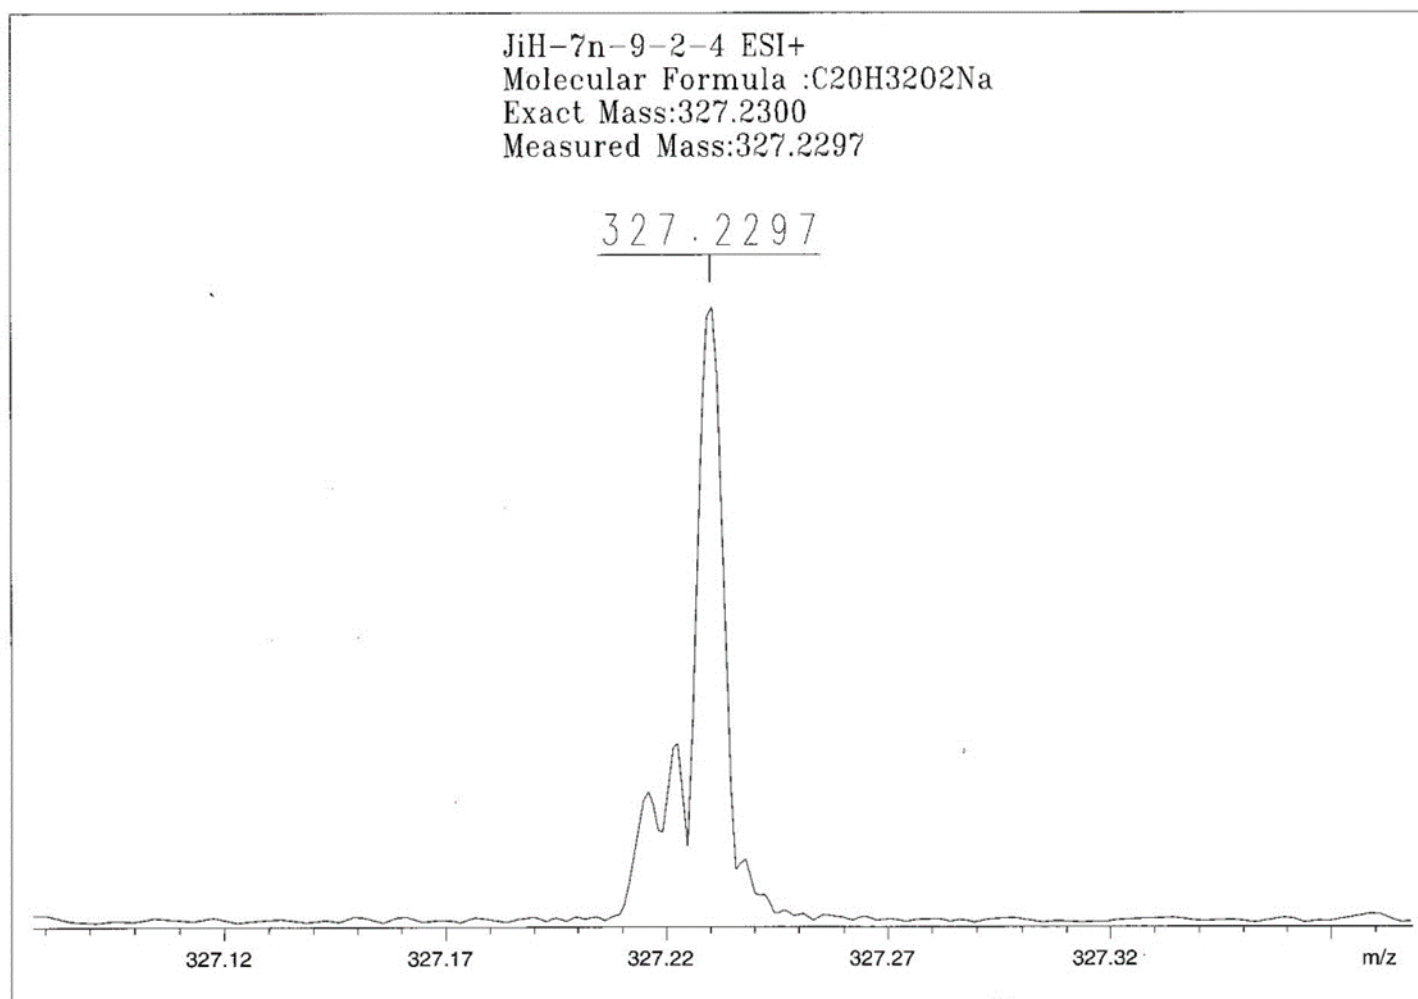

Figure S4. HRESIMS spectrum of **2**.

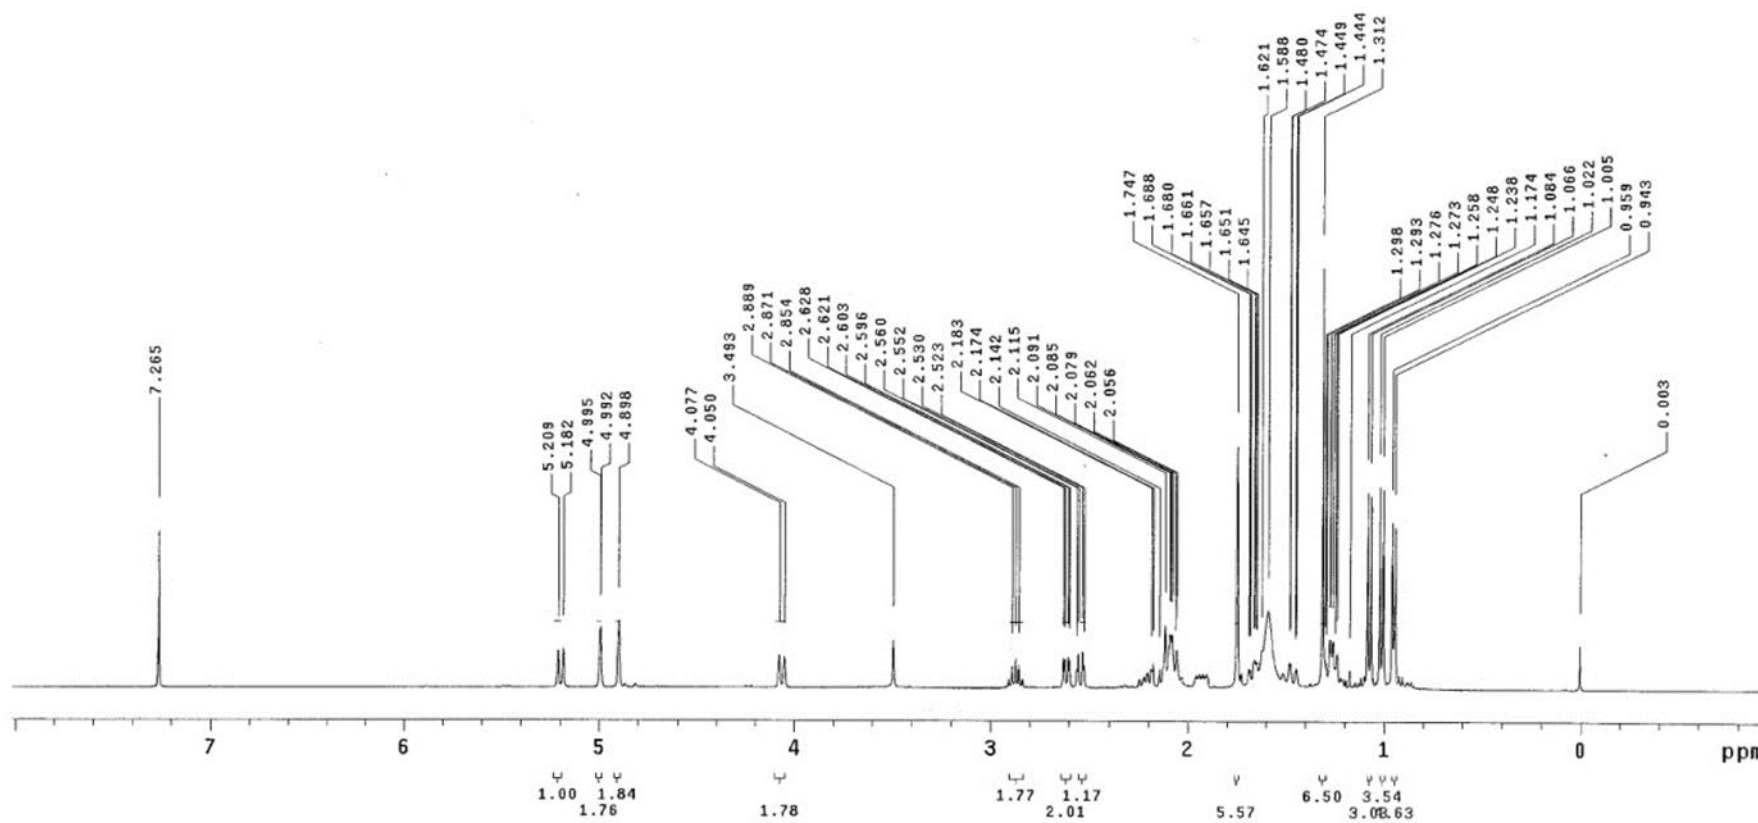

Figure S5. <sup>1</sup>H NMR spectrum of 2 in CDCl<sub>3</sub> at 400 MHz.

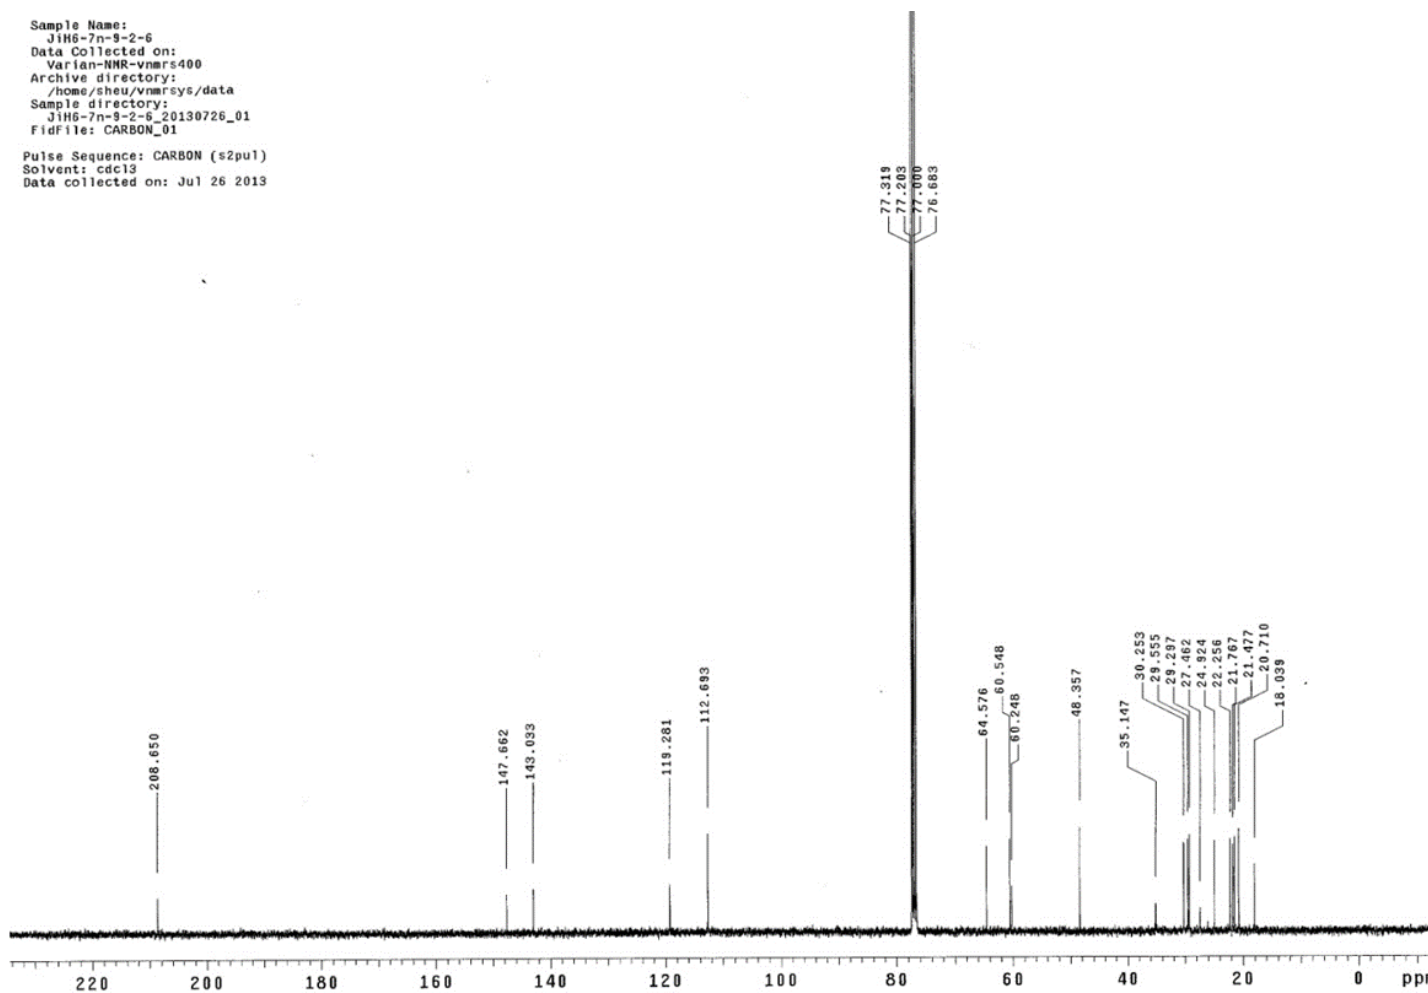Figure S6.  $^{13}\text{C}$  NMR spectrum of **2** in  $\text{CDCl}_3$  at 100 MHz.

## Mass Spectrum SmartFormula Report

### Analysis Info

Analysis Name D:\Data\1\jih614n6531\_000003.d  
Method broadband first signal  
Sample Name JIH6-14n-6-5-3-1  
Comment ESI Positive

12/27/2013 4:17:13 PM

Instrument: FT-MS solariX

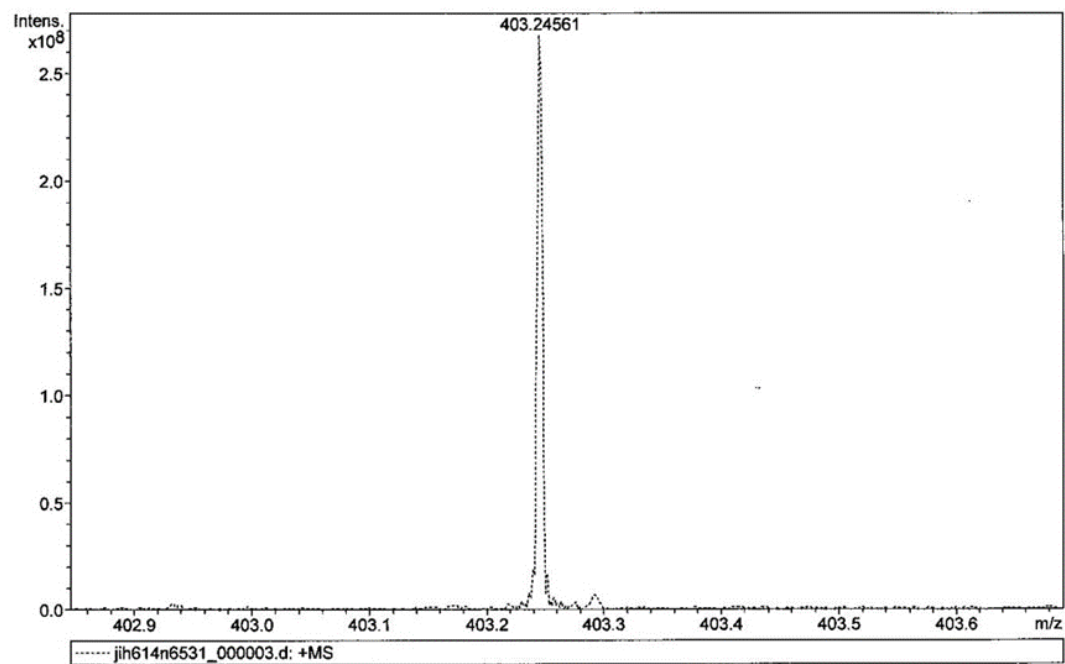

| Meas. m/z | # | Formula          | Score  | m/z       | err [mDa] | err [ppm] | mSigma | rdb | e <sup>-</sup> | Conf | N-Rule |
|-----------|---|------------------|--------|-----------|-----------|-----------|--------|-----|----------------|------|--------|
| 403.24561 | 1 | C 22 H 36 Na O 5 | 100.00 | 403.24550 | -0.11     | -0.28     | 10.8   | 4.5 | even           |      | ok     |

Figure S7. HRESIMS spectrum of 3.



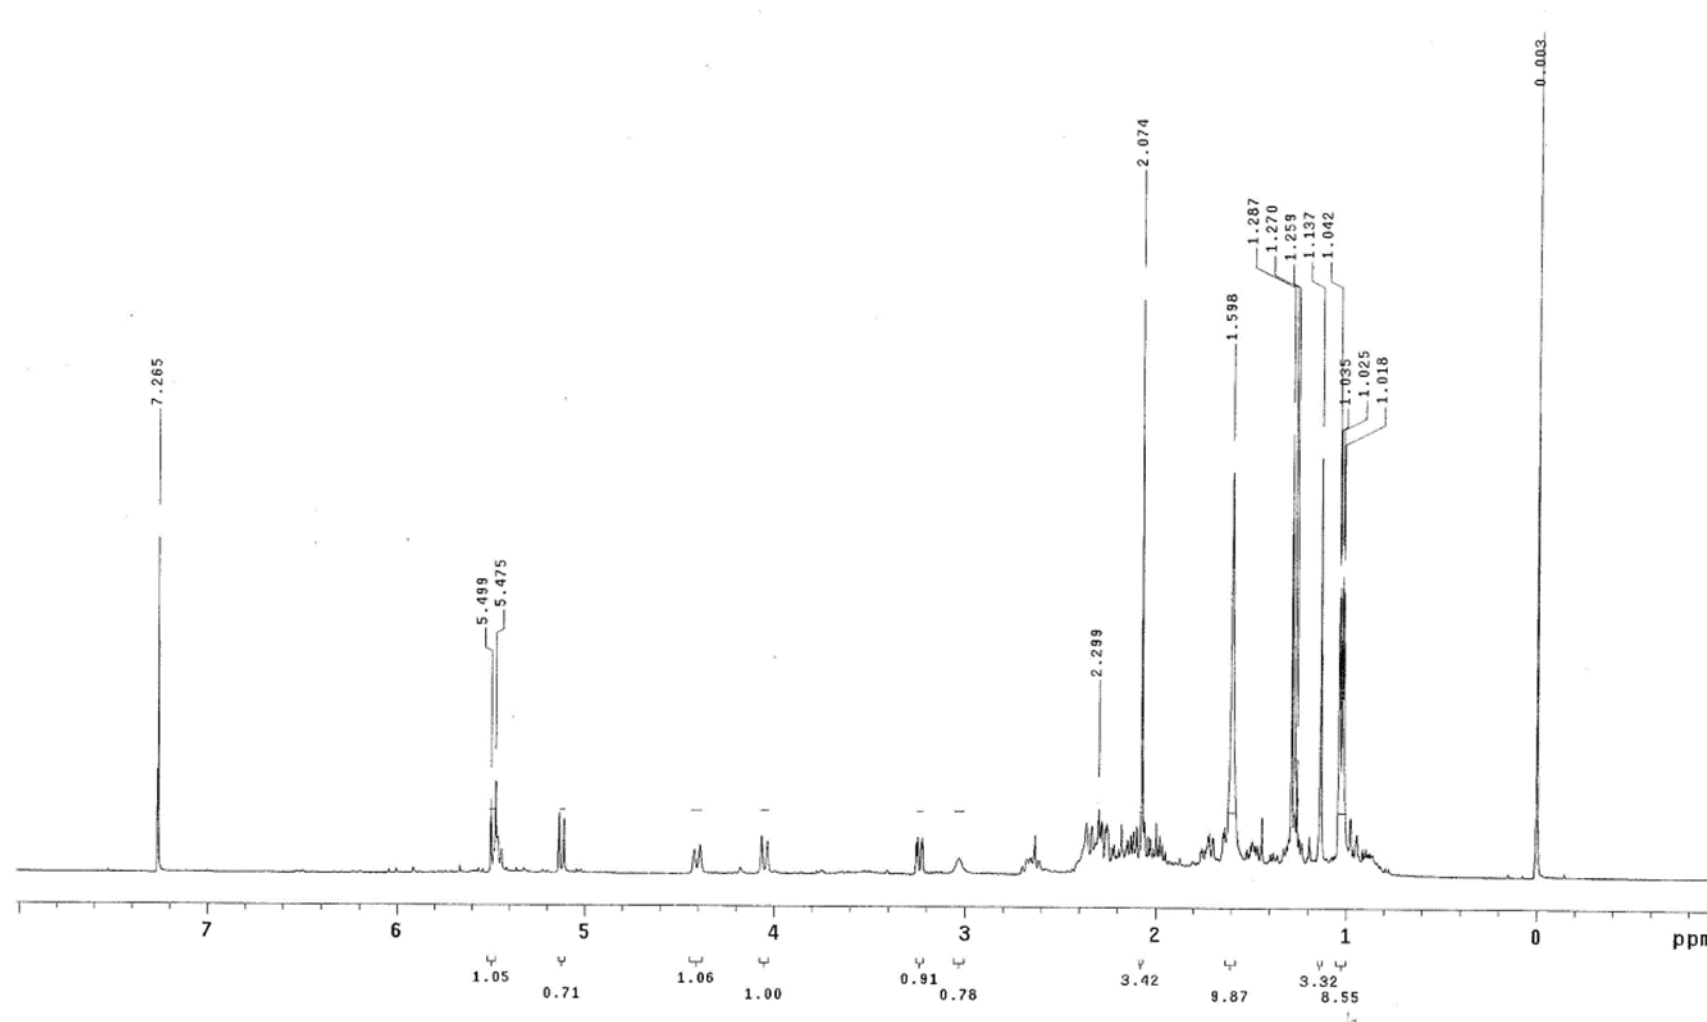

Figure S8.  $^1\text{H}$  NMR spectrum of 3 in  $\text{CDCl}_3$  at 400 MHz.

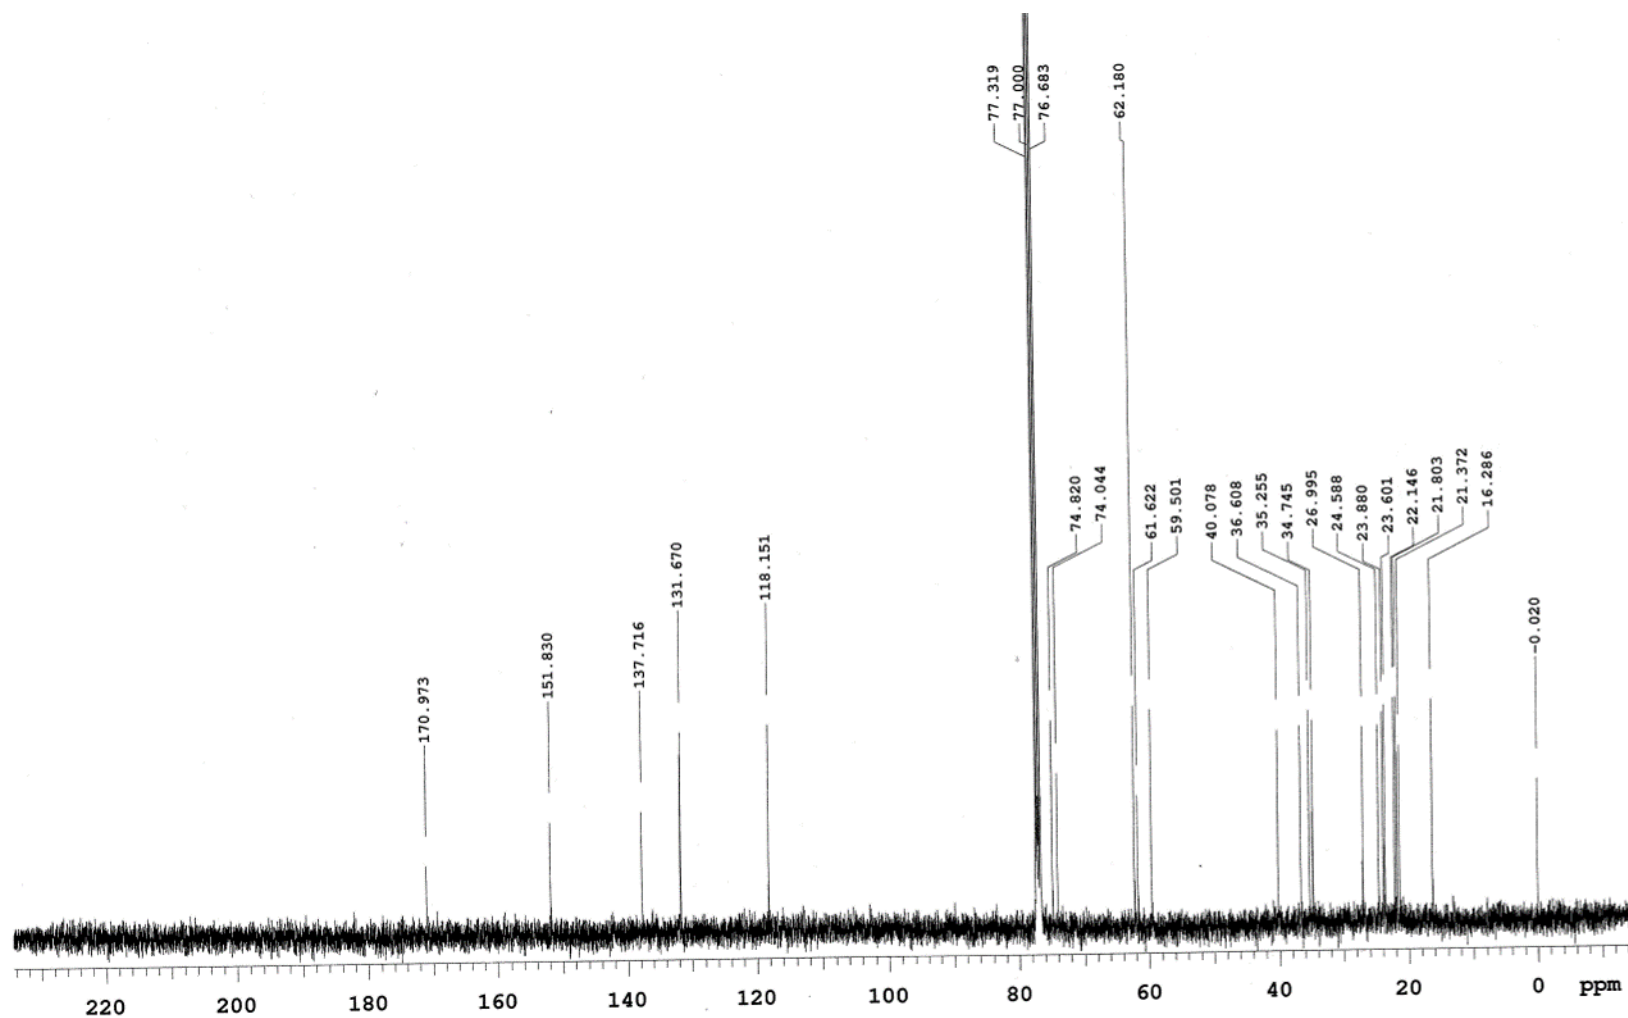Figure S9. <sup>13</sup>C NMR spectrum of 3 in CDCl<sub>3</sub> at 100 MHz.

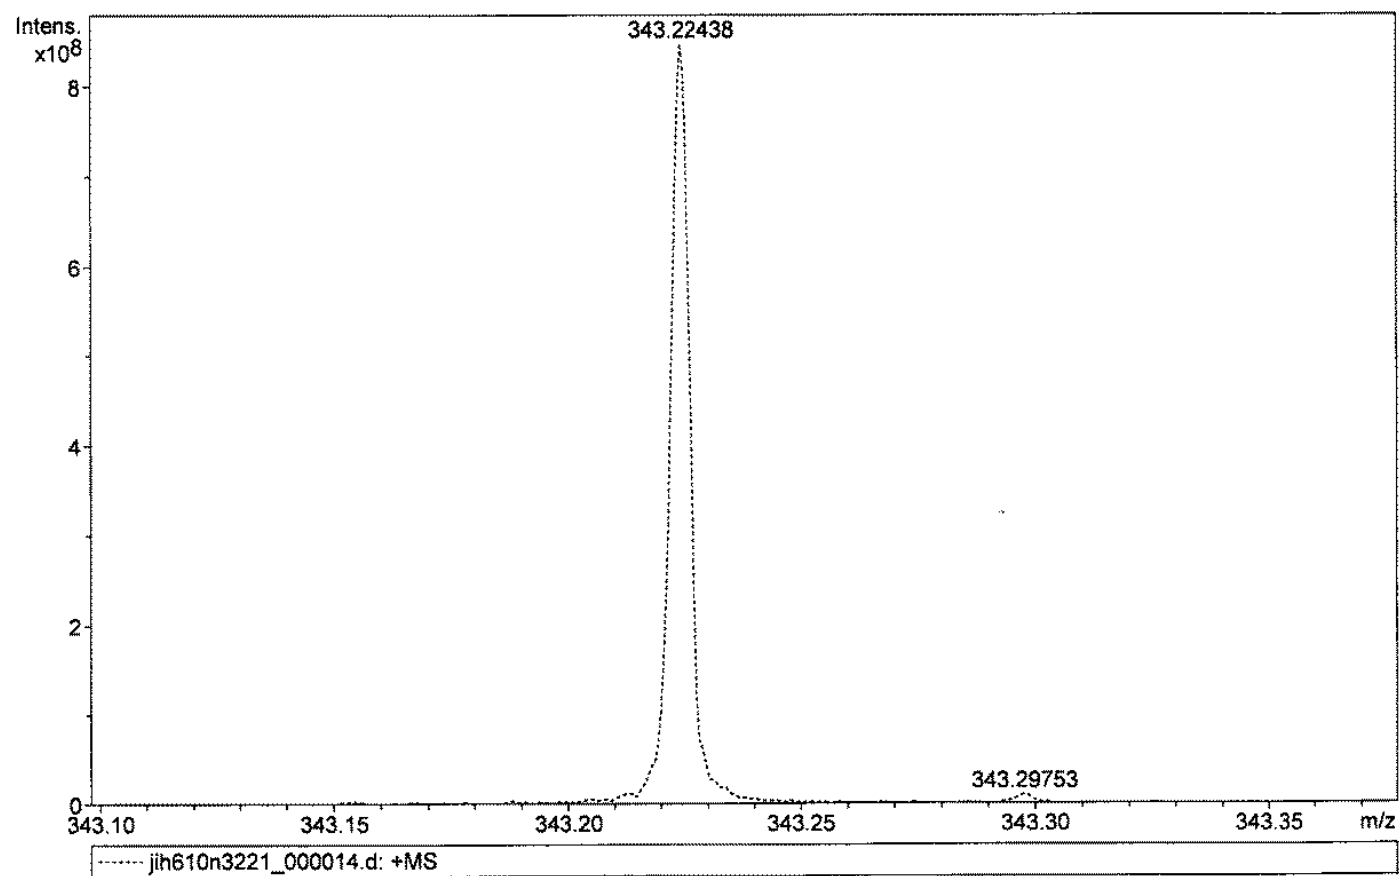

| Meas. m/z | # | Formula                                          | Score  | m/z       | err [mDa] | err [ppm] | mSigma | rdb | e <sup>-</sup> | Conf | N-Rule |
|-----------|---|--------------------------------------------------|--------|-----------|-----------|-----------|--------|-----|----------------|------|--------|
| 343.22438 | 1 | C <sub>20</sub> H <sub>32</sub> NaO <sub>3</sub> | 100.00 | 343.22437 | -0.02     | -0.05     | 8.2    | 4.5 | even           |      | ok     |

Figure S10. HRESIMS spectrum of 4.

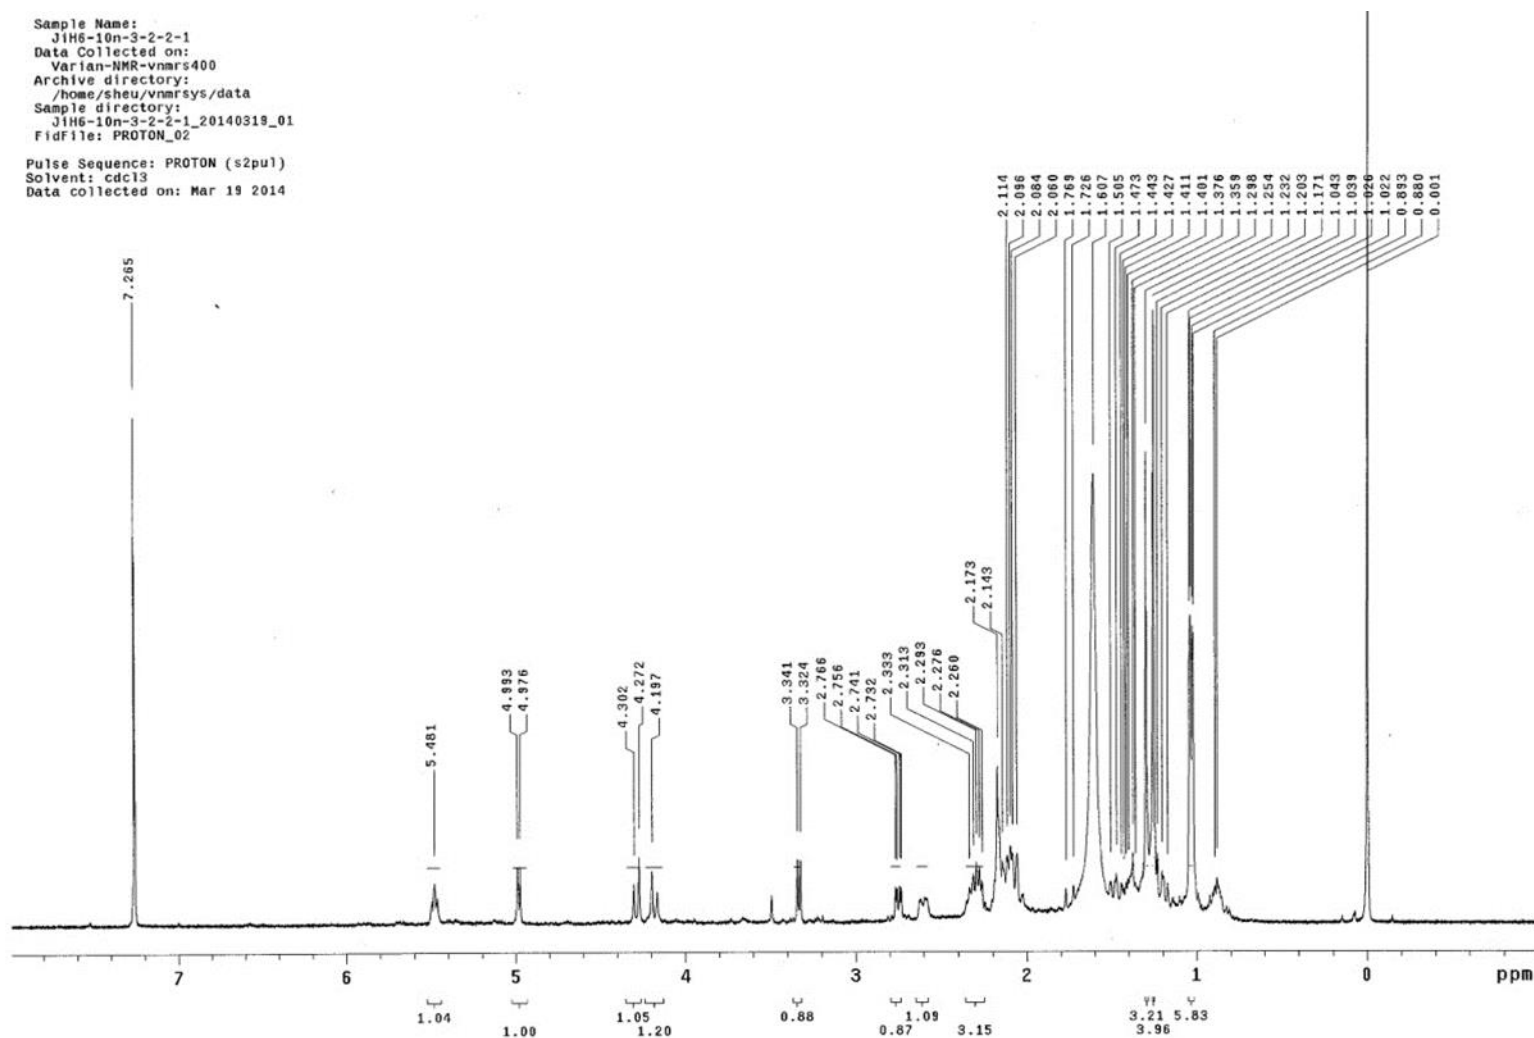Figure S11. <sup>1</sup>H NMR spectrum of **4** in CDCl<sub>3</sub> at 400 MHz.

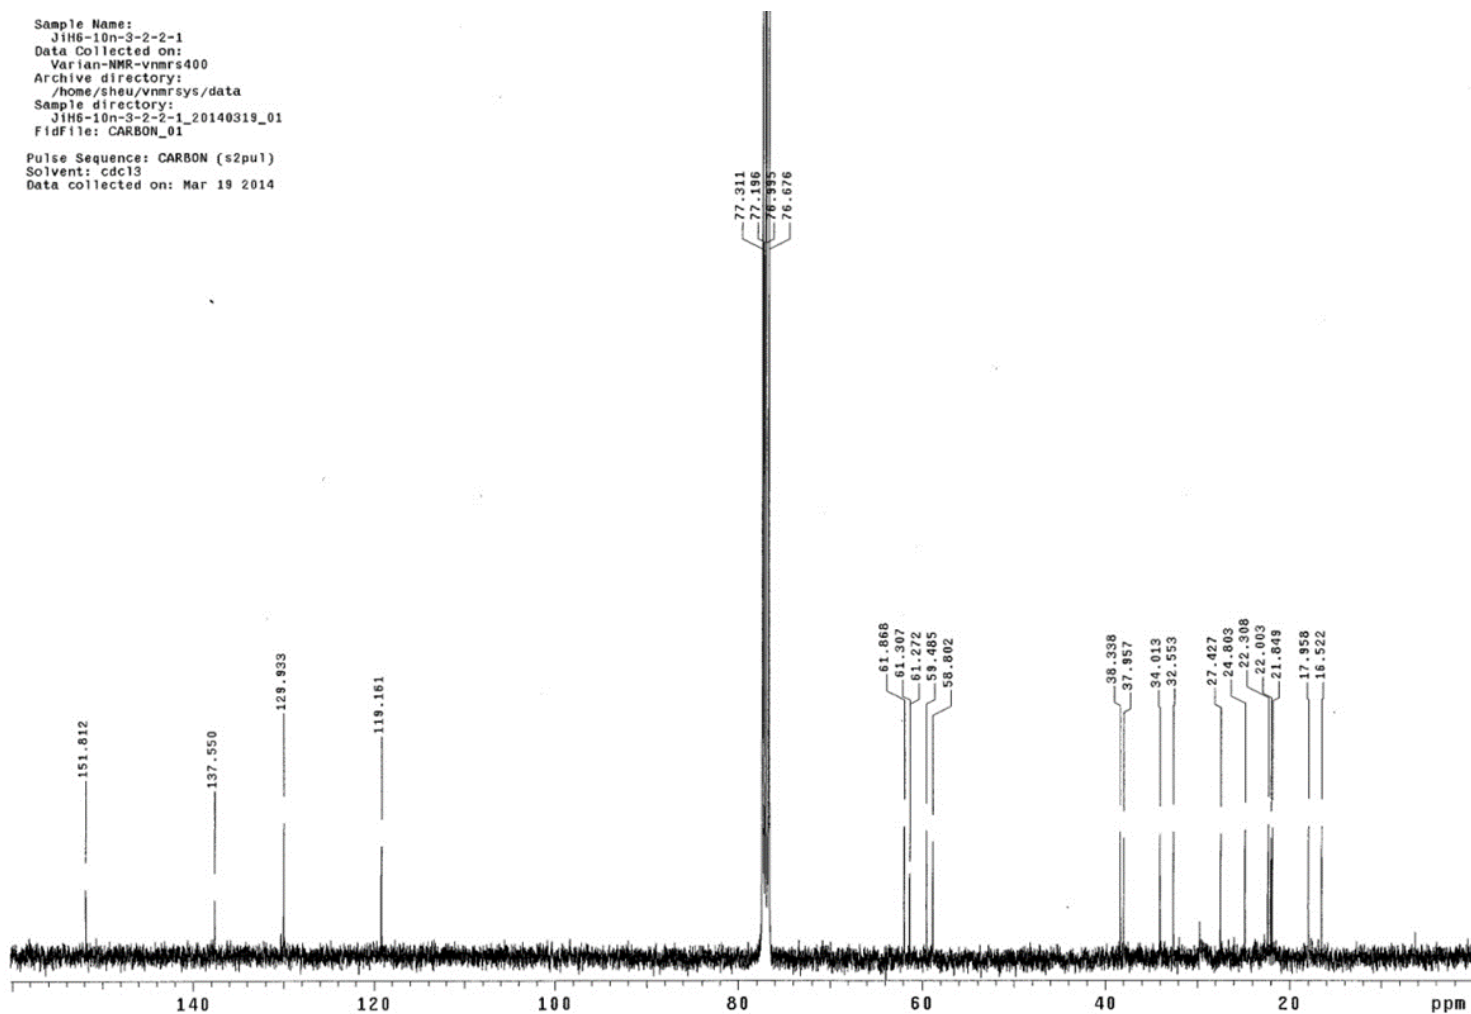

Figure S12.  $^{13}\text{C}$  NMR spectrum of **4** in  $\text{CDCl}_3$  at 100 MHz.

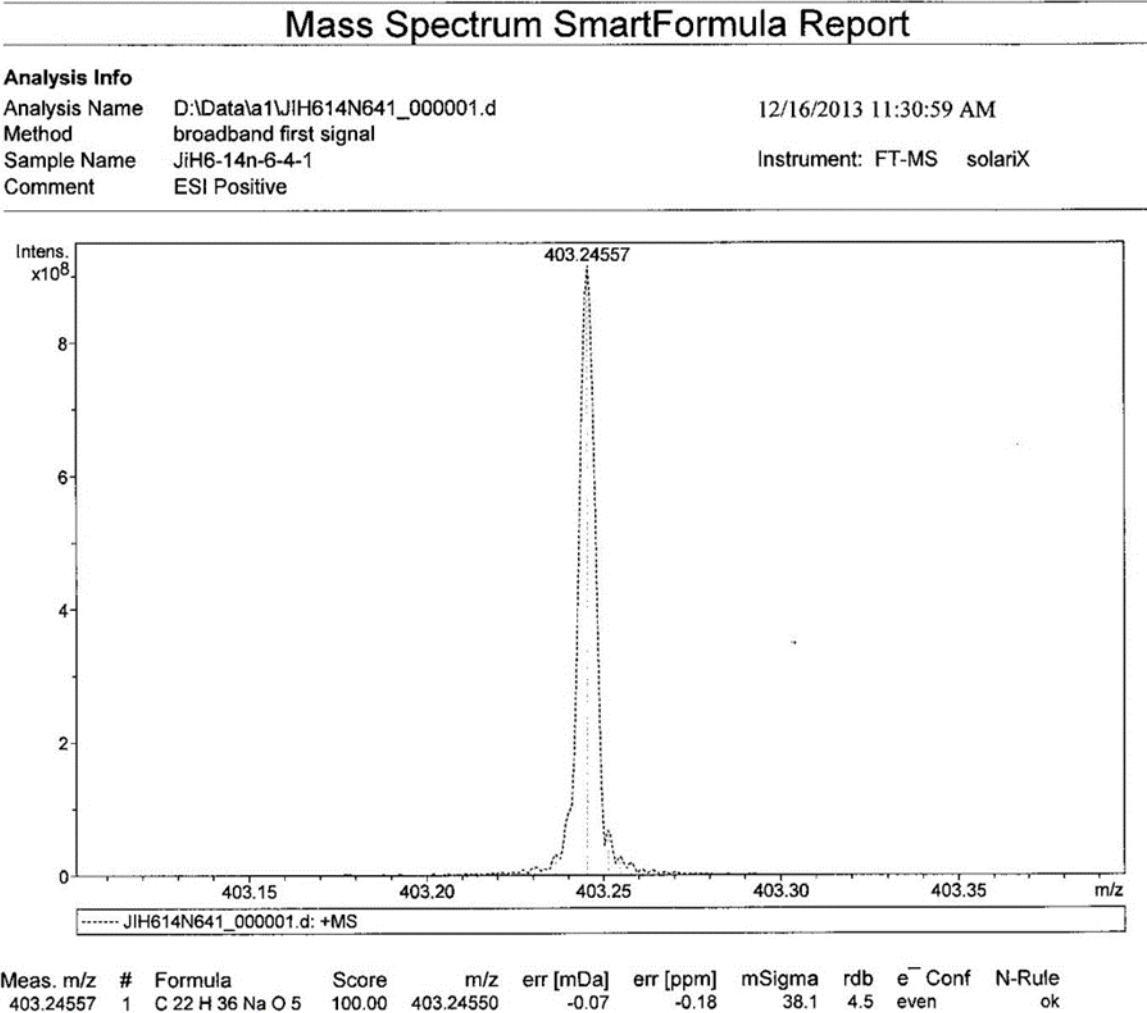

Figure S13. HRESIMS spectrum of 5.

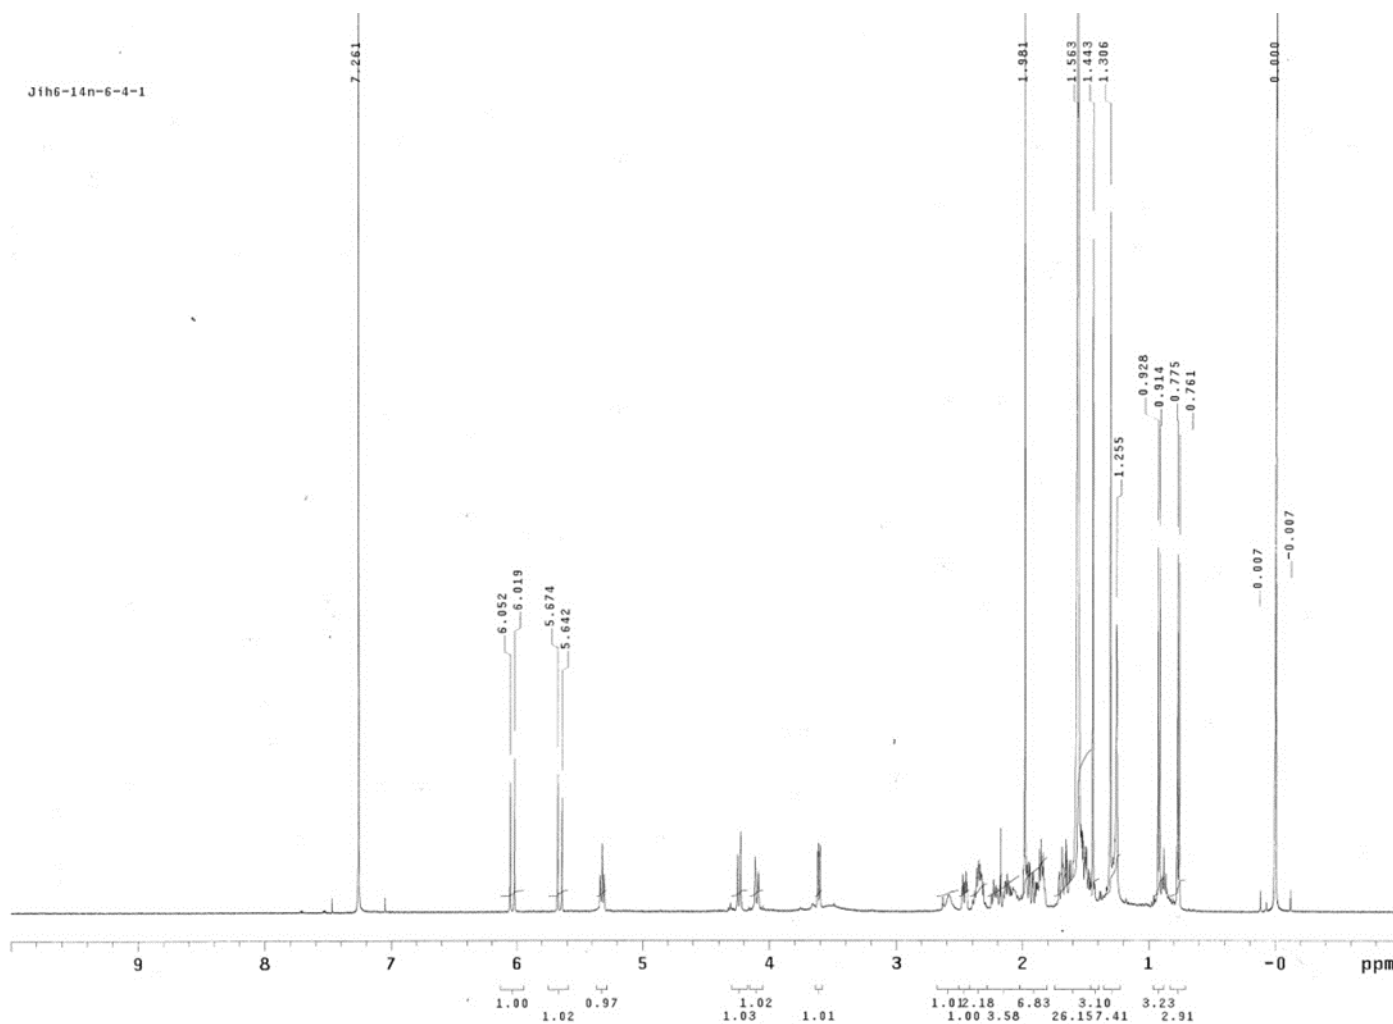

Figure S14.  $^1\text{H}$  NMR spectrum of **5** in  $\text{CDCl}_3$  at 500 MHz.

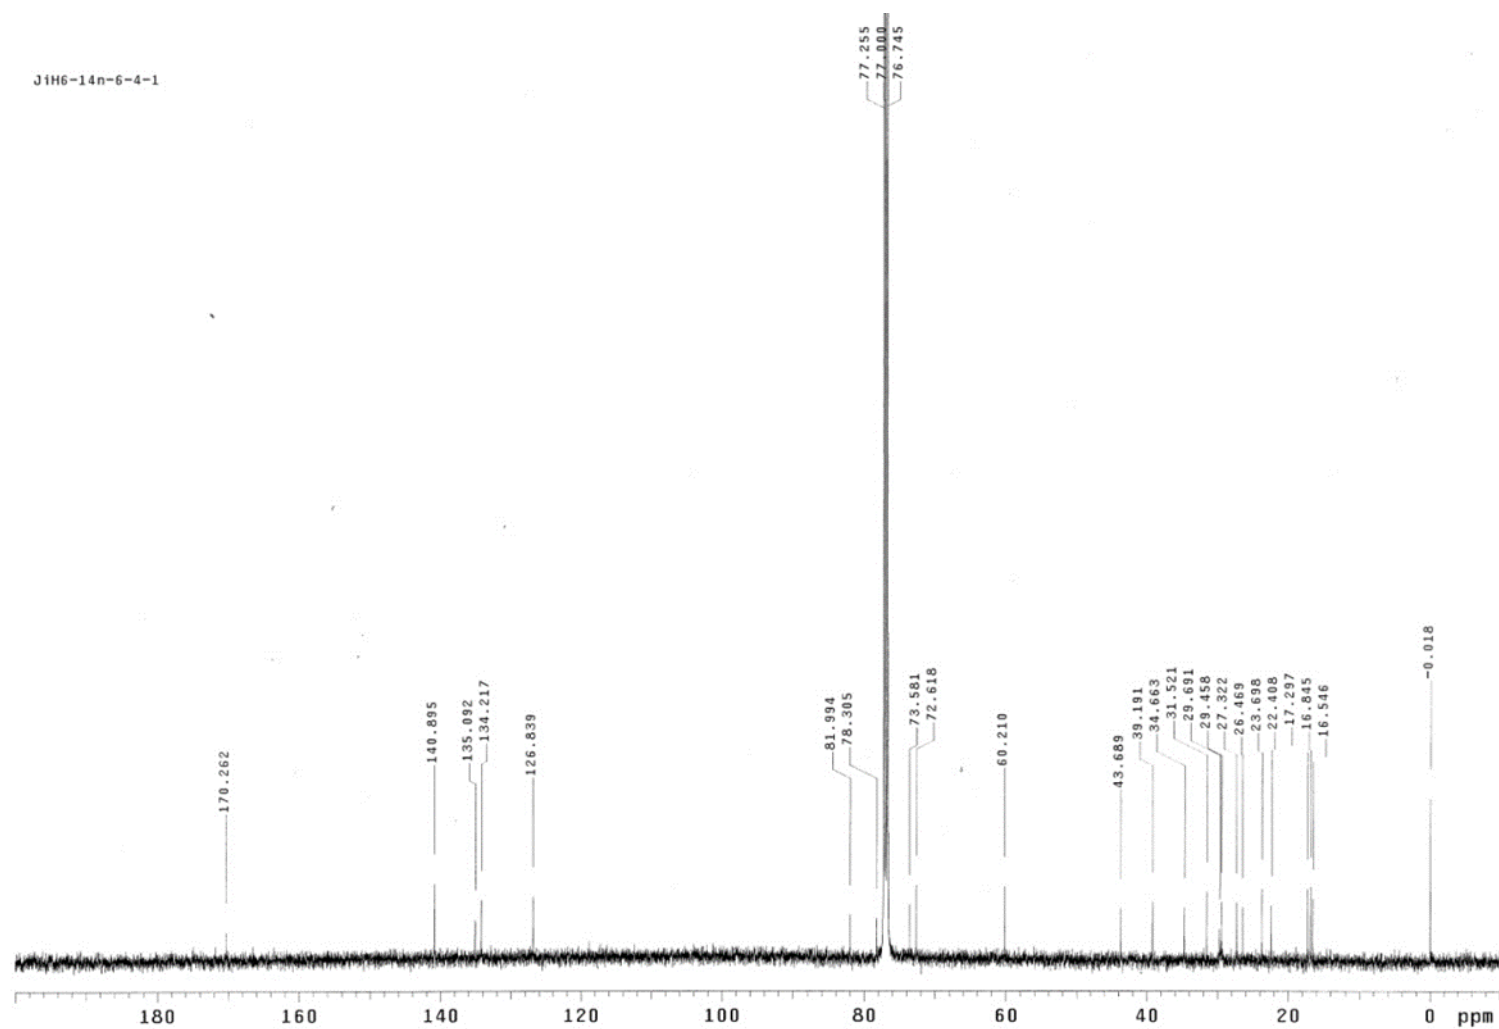

Figure S15.  $^{13}\text{C}$  NMR spectrum of **5** in  $\text{CDCl}_3$  at 125 MHz.
